# Supplementary material
Source: PubMed Central journal article supplement (PMC8788740)
Supplement: iai.00479-21-s0001.pdf [file iai.00479-21-s0001.pdf]

Figure S1

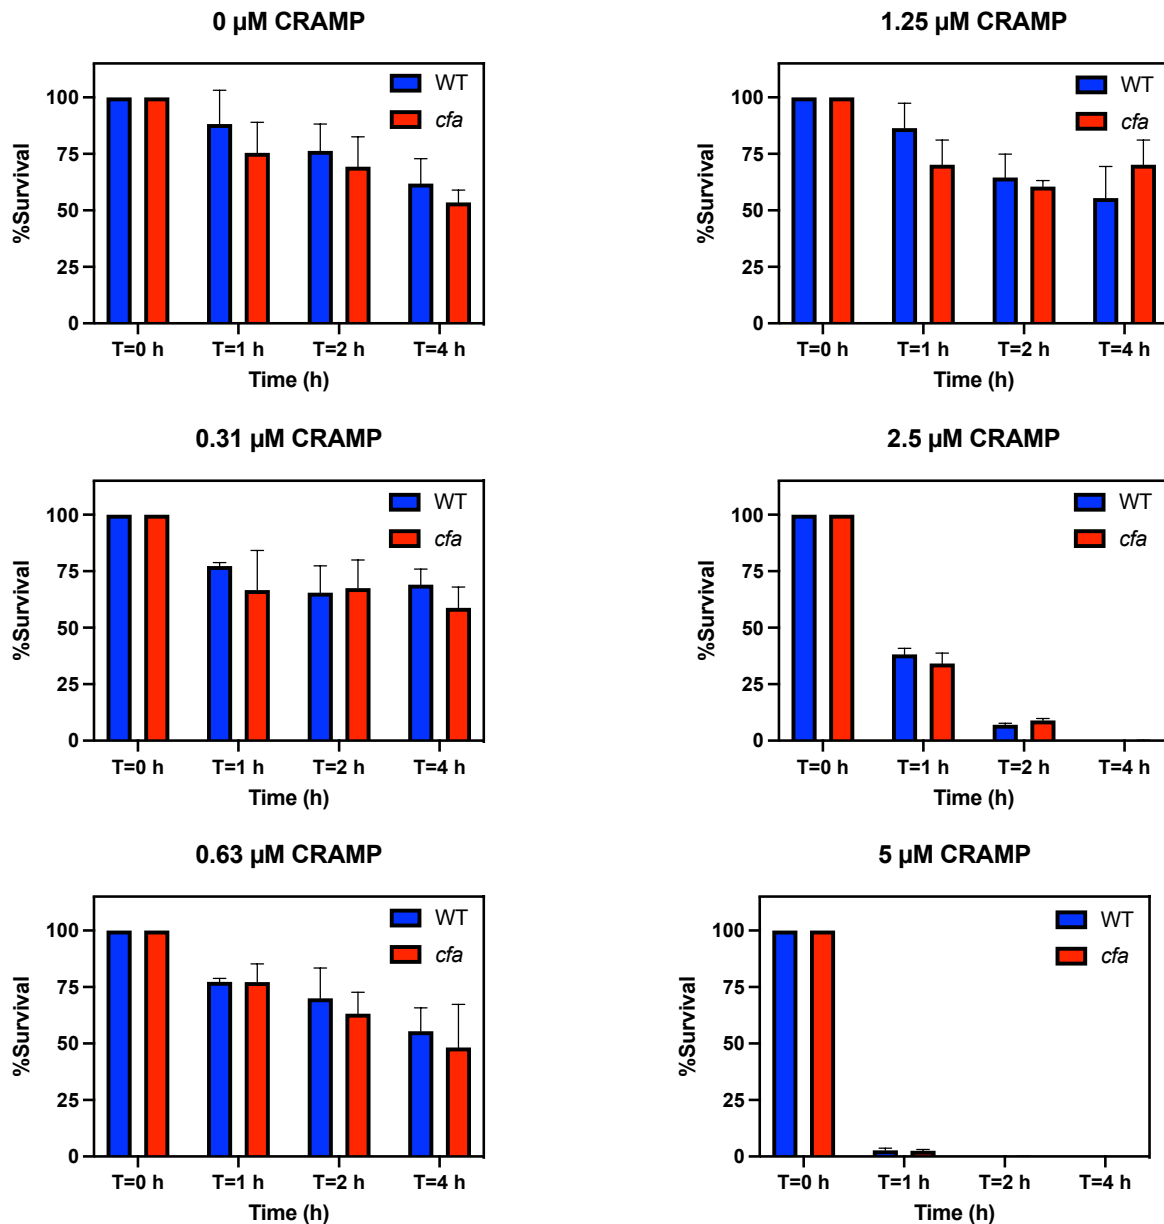

**Figure S1. Cathelicidin antimicrobial peptide CRAMP survival assay.** Overnight cultures grown in LB were resuspended in PBS to  $\sim 5 \times 10^5$  CFU ml<sup>-1</sup>, cathelicidin antimicrobial peptide CRAMP was added and the cells incubated at 37°C. At various time-points the bacteria were enumerated by plating dilutions of samples onto LB plates. %Survival was determined by calculating CFU after CRAMP treatment at each time interval divided by the CFU at T0. No difference in resistance to CRAMP killing was observed of *S. Typhimurium cfa* mutant compared to wild-type (WT).

Figure S2

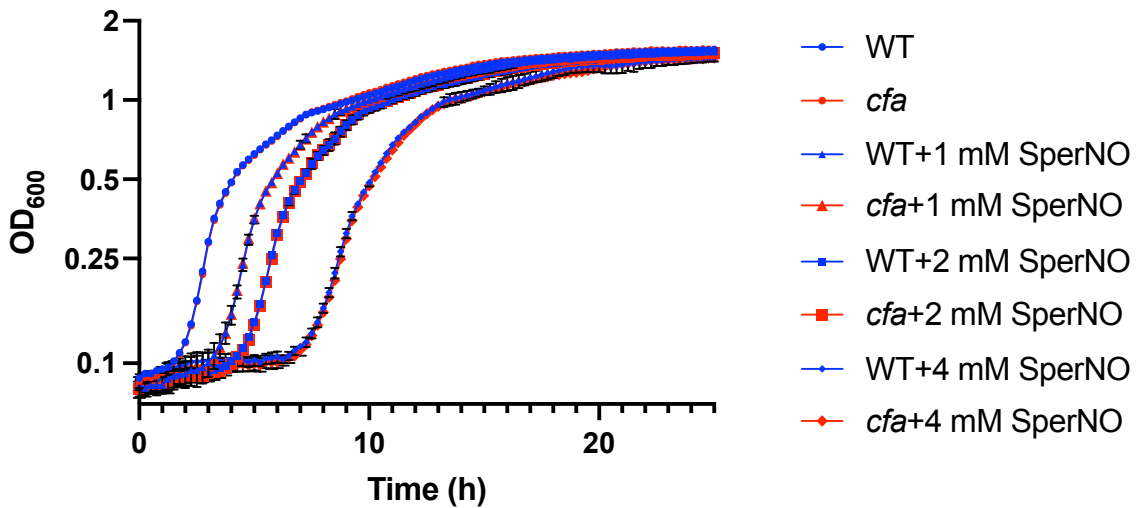

**Figure S2. SperNO growth inhibition assay.** Overnight cultures were diluted to final  $\sim 2 \times 10^6$  CFU ml<sup>-1</sup> in LB with and without nitric oxide donor spermine NONOate (SperNO). Cultures were monitored for growth by measuring the optical density at 600 nm at 37°C on a Bioscreen C Microbiology reader. We observed no difference in growth inhibition to SperNO of *S. Typhimurium cfa* mutant compared to wild-type (WT).
